# Supplementary material for: Esophageal Mucosal Permeability as a Surrogate Measure of Cure in Eosinophilic Esophagitis
Source: MDPI journal article supplement (doi:10.3390/jcm11144246), 2022-07-21
Supplement: s1 [file s1]

**Table S1.** Demographics, symptoms, and endoscopic and histologic findings of control subjects and EoE patients before treatment.

|              | Age (y) | Sex    | BMI  | Symptoms    | Endoscopic findings            | Histological findings |              |                |               |
|--------------|---------|--------|------|-------------|--------------------------------|-----------------------|--------------|----------------|---------------|
|              |         |        |      |             |                                | Eosinophils/HPF       | Permeability | Mast cells/HPF | IgG4 deposits |
| EoE patients |         |        |      |             |                                |                       |              |                |               |
| 1            | 41      | Male   | 31.6 | Odynophagia | Furrows, white exudates        | 38                    | High         | 10             | +             |
| 2            | 64      | Female | 21.5 | Dysphasia   | Furrows, white exudates        | 35                    | High         | 10             | +             |
| 3            | 45      | Male   | 24.6 | Odynophagia | Furrows                        | 33                    | High         | 10             | +             |
| 4            | 32      | Female | 19.1 | Heartburn   | Furrows, white exudates        | 22                    | High         | 10             | +             |
| 5            | 51      | Female | 22.4 | Odynophagia | Furrows                        | 29                    | High         | 8              | +             |
| 6            | 59      | Male   | 27.1 | Heartburn   | Furrows, white exudates        | 23                    | High         | 4              | +             |
| 7            | 54      | Male   | 27.4 | Dysphasia   | Rings, furrows, white exudates | 17                    | High         | 20             | +             |
| 8            | 35      | Male   | 20.8 | Heartburn   | Furrows, white exudates        | 69                    | High         | 12             | +             |
| 9            | 20      | Male   | 17.4 | Heartburn   | Rings, furrows, white exudates | 48                    | High         | 17             | +             |
| 10           | 41      | Male   | 21.6 | Nausea      | Furrows, white exudates        | 20                    | High         | 8              | +             |
| 11           | 35      | Female | 19.1 | Dysphasia   | Furrows                        | 20                    | High         | 7              | +             |
| Controls     |         |        |      |             |                                |                       |              |                |               |
| 12           | 65      | Female | 22.5 | No          | Normal                         | 0                     | Normal       | 0              | -             |
| 13           | 49      | Female | 17.7 | No          | Normal                         | 0                     | Normal       | 0              | -             |
| 14           | 69      | Female | 19.5 | No          | Normal                         | 0                     | Normal       | 0              | -             |
| 15           | 41      | Male   | 19.8 | No          | Normal                         | 0                     | Normal       | 0              | -             |
| 16           | 45      | Female | 33.6 | No          | Normal                         | 0                     | Normal       | 0              | -             |
| 17           | 63      | Female | 28.9 | No          | Normal                         | 0                     | Normal       | 0              | -             |
| 18           | 61      | Male   | 22.8 | Heartburn   | Normal                         | 0                     | Normal       | 0              | -             |
| 19           | 57      | Male   | 25.9 | No          | Normal                         | 0                     | Normal       | 0              | -             |
| 20           | 57      | Male   | 21.5 | No          | Normal                         | 0                     | Normal       | 0              | -             |
| 21           | 52      | Male   | 28.4 | No          | Normal                         | 0                     | Normal       | 0              | -             |
| 22           | 27      | Female | 22.9 | No          | Normal                         | 0                     | Normal       | 0              | -             |

Abbreviation: BMI, body mass index; EoE, eosinophilic esophagitis, HPF, high-power field.

**Table S2.** Treatment, symptoms, endoscopic and histologic findings of EoE patients after treatment.

| Table S2. Treatment, symptoms, endoscopic and histologic findings of 202 patients after treatment. |                                         |             |                         |                     |              |                |               |
|----------------------------------------------------------------------------------------------------|-----------------------------------------|-------------|-------------------------|---------------------|--------------|----------------|---------------|
| Medication (months)                                                                                |                                         | Symptoms    | Endoscopic findings     | Histologic findings |              |                |               |
|                                                                                                    |                                         |             |                         | Eosinophils/HPF     | Permeability | Mast cells/HPF | IgG4 deposits |
| First follow-up                                                                                    |                                         |             |                         |                     |              |                |               |
| 1                                                                                                  | Vonoprazan 20 mg + topical steroid (5)  | No symptoms | Shallow furrows         | 5                   | High         | 1              | -             |
| 2                                                                                                  | Vonoprazan 20 mg (3)                    | No symptoms | Shallow furrows         | 3                   | high         | 3              | +             |
| 3                                                                                                  | Vonoprazan 10 mg (9)                    | No symptoms | Furrows, white exudates | 8                   | High         | 7              | +             |
| 4                                                                                                  | Vonoprazan 20 mg + topical steroid (7)  | No symptoms | Shallow furrows         | 8                   | High         | 7              | +             |
| 5                                                                                                  | Vonoprazan 20 mg (9)                    | Odynophagia | Furrows                 | 5                   | High         | 8              | +             |
| 6                                                                                                  | Vonoprazan 20 mg + topical steroid (4)  | Heartburn   | Shallow furrows         | 3                   | Decreased    | 2              | -             |
| 7                                                                                                  | Vonoprazan 20 mg (3)                    | Dysphasia   | Furrows                 | 2                   | Decreased    | 2              | -             |
| 8                                                                                                  | Vonoprazan 20 mg (28)                   | Heartburn   | Furrows                 | 15                  | High         | 13             | +             |
| 9                                                                                                  | Vonoprazan 10 mg (3)                    | No symptoms | Rings                   | 72                  | High         | 8              | +             |
| 10                                                                                                 | Vonoprazan 20 mg + topical steroid (11) | Nausea      | furrows, white exudates | 20                  | High         | 5              | +             |
| 11                                                                                                 | Esomeprazole 20mg (2)                   | Dysphasia   | Furrows                 | 22                  | High         | 9              | +             |
| Second follow-up                                                                                   |                                         |             |                         |                     |              |                |               |
| 1                                                                                                  | Vonoprazan 20 mg (11)                   | No symptoms | Normal                  | 0                   | Decreased    | 1              | -             |
| 2                                                                                                  | Vonoprazan 10 mg (6)                    | No symptoms | Normal                  | 0                   | Decreased    | 0              | -             |
| 3                                                                                                  | Vonoprazan 10 mg (14)                   | No symptoms | Normal                  | 0                   | Decreased    | 0              | -             |

Abbreviation: HPF, high-power field
